# Supplementary material for: Rescue therapy with Tanshinone IIA hinders transition of acute kidney injury to chronic kidney disease via targeting GSK3β
Source: PubMed Central journal article supplement (PMC5114614; doi:10.1038/srep36698), 2016-11-18
Supplement: srep36698-s1.pdf [file srep36698-s1.pdf]

# **Rescue therapy with Tanshinone IIA hinders transition of acute kidney injury to chronic kidney disease via targeting GSK3 $\beta$**

Chunming Jiang<sup>1, 4</sup>, Wei Zhu<sup>1</sup>, Xiang Yan<sup>2</sup>, Qiuyuan Shao<sup>1</sup>, Biao Xu<sup>3</sup>, Miao Zhang<sup>1</sup>,  
Rujun Gong<sup>4</sup>

<sup>1</sup>*Department of Nephrology, <sup>2</sup>Department of Urology and <sup>3</sup>Department of Cardiology, Affiliated Nanjing Drum Tower Hospital, Nanjing University School of Medicine, Nanjing, China; <sup>4</sup>Division of Kidney Disease and Hypertension, Department of Medicine, Rhode Island Hospital, Brown University School of Medicine, Providence, Rhode Island, USA.*

## Supplementary Figure S1

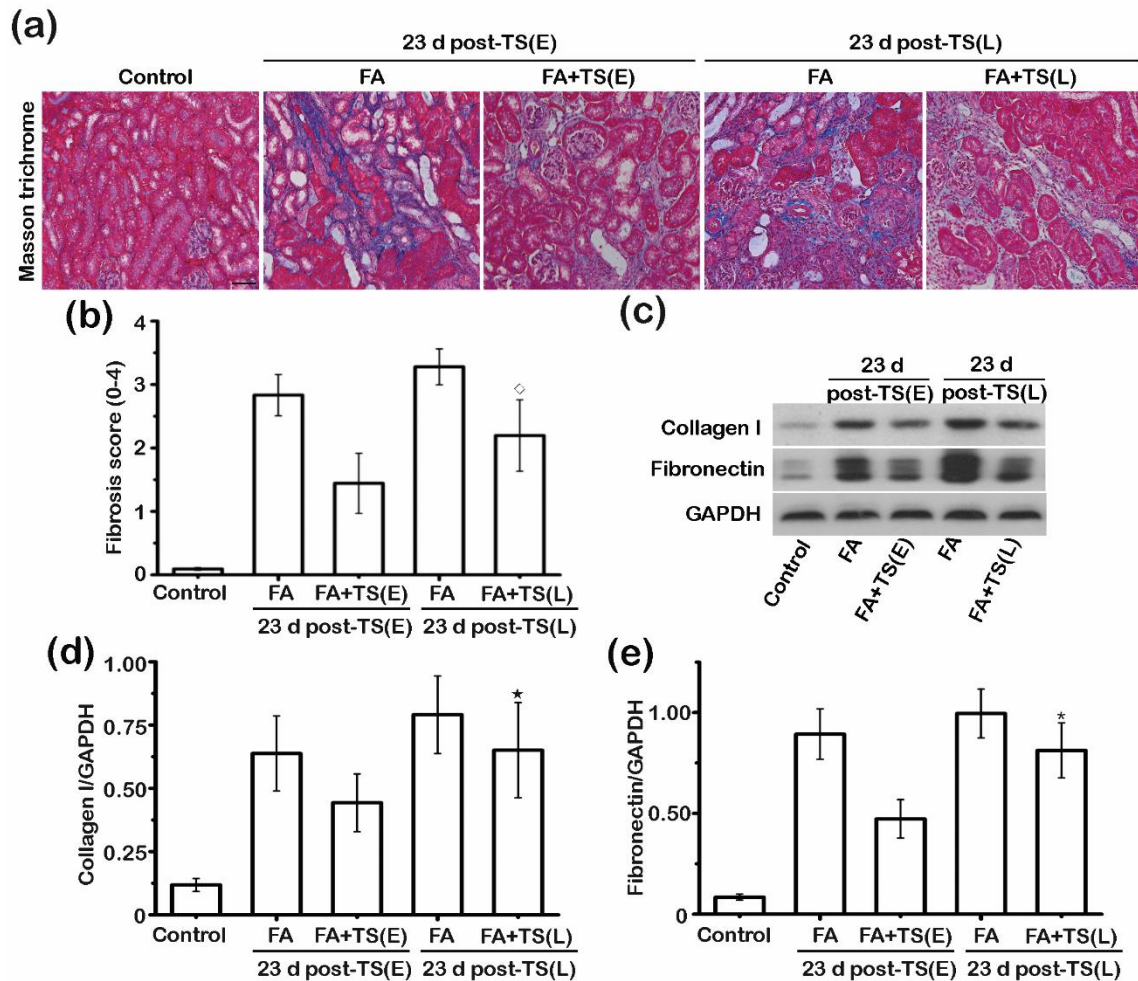

**Supplementary Figure S1. The superior therapeutic efficacy of early *versus* late Tanshinone IIA treatment is unlikely attributable to the difference in treatment duration.** a, Representative micrographs showing Masson trichrome staining of kidney specimens procured on day 23 after either early or late Tanshinone IIA administration; Scale bar = 200  $\mu$ m. b, Kidney fibrosis score assessed based on evaluation of Masson trichrome staining.  $\diamond P=0.026$  vs FA+TS(E). c, Representative immunoblots of collagen I and fibronectin in cortical kidney lysates. d and e, Relative abundance of collagen I (d) and fibronectin (e) in immunoblots expressed as densitometric ratios of collagen I/GAPDH or fibronectin/GAPDH.  $\star P=0.033$  vs FA+TS(E);  $\star P=0.017$  vs FA+TS(E); ( $n=9$ ).
